# Supplementary material for: Activating bimetallic ZIF-derived polymers using facile steam-etching for the ORR
Source: Royal Society of Chemistry journal article supplement (doi:10.1039/d2nj02425j), 2022-01-01
Supplement: d2nj02425j1.pdf [file d2nj02425j1.pdf]

## Electronic Supplementary Information

### Activating Bimetallic ZIF-derived Polymers Using Facile Steam- Etching for ORR

Yanling Wu<sup>a</sup>, Miantuo Li<sup>b</sup>, Liping Ma<sup>a</sup>, Minghui Lu<sup>a</sup>, Haijun Zhang<sup>c,\*</sup>, Meili Qi<sup>a,\*</sup>

---

*a.* School of Transportation and Civil Engineering, Shandong Jiaotong University, Ji'nan 250357, China. E-mail: beauty0507@163.com.

*b.* School of Materials Science and Engineering, China University of Petroleum (East China), Qingdao 266580, China.

*c.* Department of Vascular & Intervention, Tenth Peoples' Hospital of Tongji University, Shanghai 200072, China. E-mail: zhanghaijun@tongji.edu.cn.

## The experiment section

### 1. Chemical and reagents

Zinc nitrate ( $\text{Zn}(\text{NO}_3)_2 \cdot 6\text{H}_2\text{O}$ ), ferric nitrate hexahydrate ( $\text{Fe}(\text{NO}_3)_3 \cdot 9\text{H}_2\text{O}$ ), N, N'-carbonyldiimidazole (CDI), dicyandiamide (DICY), PEG 2000, and phytic acid (PA) were purchased from Aladdin (Shanghai, China). Nafion (5 wt.%) and commercial platinum/carbon (20 wt.% Pt/C) were purchased from Alfa Aesar Co. Ltd.

### 2. Preparation process of precursor 1

Initially, 40 mmol CDI was dissolved into 100 mL ethanol and 10 mmol  $\text{Zn}(\text{NO}_3)_2 \cdot 6\text{H}_2\text{O}$  was dissolved into 50 mL ethanol, respectively. At room temperature, above-prepared solutions were mixed rapidly and stirred vigorously for 24 h. 3 mmol  $\text{Fe}(\text{NO}_3)_3 \cdot 9\text{H}_2\text{O}$  was then added. The mixture was kept stirring for another 12 h at room temperature. The mixed liquid was then centrifuged at 6000 rpm for 10 min. The precipitate was washed three times with ethanol and was dried under vacuum at 60°C. The bimetallic polymer (denoted as Fe/Zn-ZIFs@ $\text{ZnCO}_3$ ) of precursor 1 was acquired.

### 3. Preparation process of precursor 2

For precursor 2, in a typical process, 5 g of dicyandiamide (DICY), 0.5 g of PEG 2000 and 2 mL of phytic acid (PA) were added into 40 mL of distilled water. Then the mixed solution was stirred at 60°C for 30 min and dried at 80°C.

### 4. Material characterization

Laboratory powder X-ray diffraction patterns were collected for the samples on a Rigaku Ultima IV X-ray diffractometer with Cu K $\alpha$  source (40 kV, 40 mA). The morphology and structure of the samples were observed on field-emission scanning electron microscope (FE-SEM, Quant 250FEG) and high-resolution transmission electron microscopy at an acceleration voltage of 200 kV (TEM, JEM-2100F). Micromeritics Belsorp-max analyzer was applied to measure the Brunauer Emmett Teller (BET) surface area and pore size distribution (PSD). X-ray photoelectron spectroscopic (XPS) measurements were conducted on an Axis Ultra instrument from Kratos using monochromatic Al K $\alpha$  radiation.

### 5. Electrochemical measurements

All electrochemical measurements were carried out by using a standard three-electrode configuration on a Gamry (RDE710) electrochemical workstation, where the Ag/AgCl (KCl-saturated) electrode and a carbon rod were used as reference and counter electrodes, respectively. To ensure the repeatability of the experiment, the working electrode for each of the four catalysts was prepared by using under uniform condition. The procedure for the preparation of a working electrode was as following: the catalyst powder (5 mg) was dispersed in 0.8 mL of ethyl alcohol with 40  $\mu\text{L}$  of Nafion solution (5 wt %, Sigma-Aldrich) under

sonication to obtain a homogeneous suspension. Then, the catalyst ink ( $10\ \mu\text{L}$ ,  $0.30\ \text{mg}\cdot\text{cm}^{-2}$ ) was dropped on the glass carbon electrode surface. For ORR tests, Cyclic voltammetry (CV) curves were collected in a  $\text{N}_2$ -saturated or  $\text{O}_2$ -saturated  $0.1\ \text{M}$  KOH electrolyte at a scan rate of  $50\ \text{mV}\cdot\text{s}^{-1}$ . Additionally, the activity for ORR was also evaluated *via* the RDE method by LSV from  $0.2$  to  $-0.8\ \text{V}$  in  $\text{O}_2$ -saturated  $0.1\ \text{M}$  KOH electrolyte. The ORR stability in  $\text{O}_2$ -saturated  $0.1\ \text{M}$  KOH solution was tested by current versus time (i-t) test with a rotating speed of  $1600\ \text{rpm}$ . The ORR performance of the as-prepared catalysts were make a comparison with the state-of-the-art commercial Pt/C ( $20\ \text{wt}\%$ ) electrocatalyst (HiSPEC<sup>R</sup>3000, Alfa Aesar).

Supplementary figures

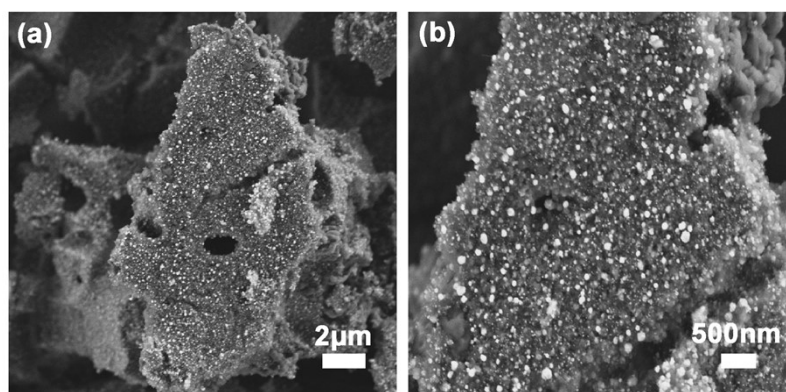

Fig. S1 Representative SEM images of the Fe<sub>3</sub>C@NC.

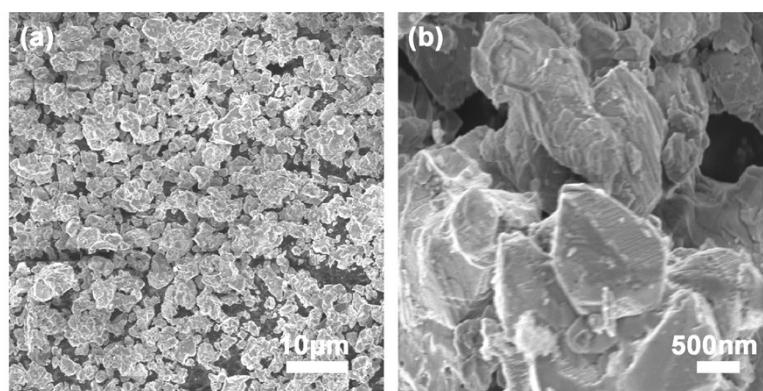

Fig. S2 Representative SEM images of the precursor 1.

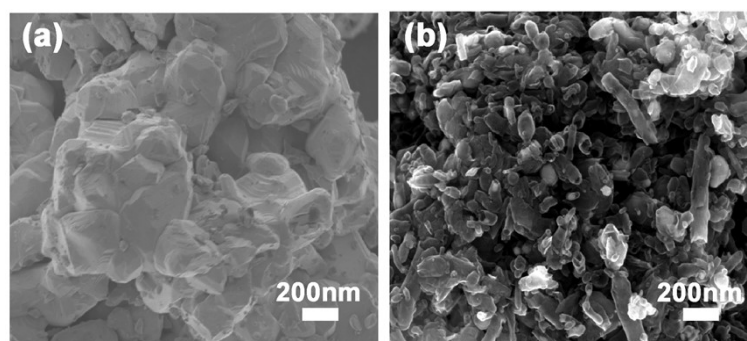

Fig. S3 Representative SEM images of the γ-Fe<sub>2</sub>O<sub>3</sub>@NPC (a) and the α-Fe<sub>2</sub>O<sub>3</sub>/γ-Fe<sub>2</sub>O<sub>3</sub>@NPC (b).

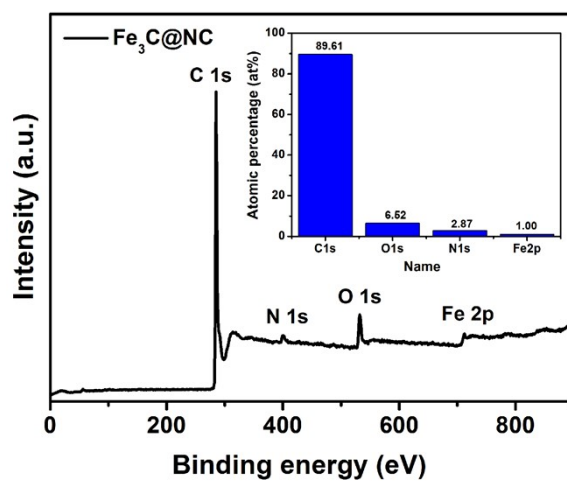

Fig. S4 XPS survey spectrum of Fe<sub>3</sub>C@NC.

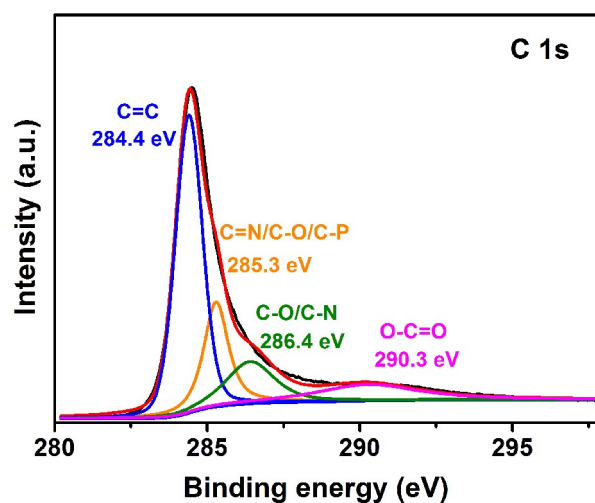

Fig. S5 High-resolution XPS spectrum of C 1s core level for  $\alpha$ -Fe<sub>2</sub>O<sub>3</sub>/Fe@NPC.

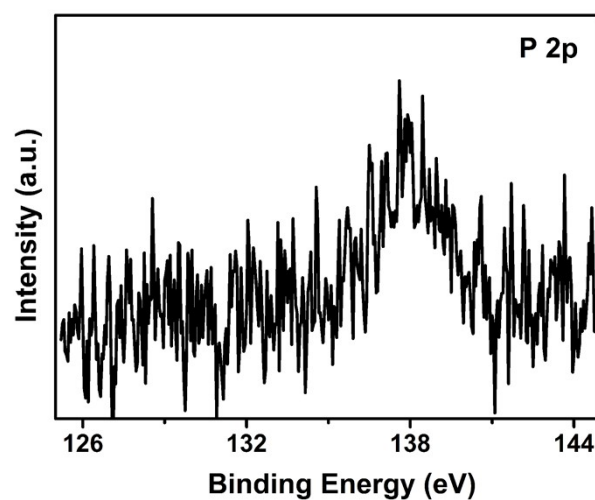

Fig. S6 High-resolution XPS spectrum of P 2p core level for  $\alpha$ -Fe<sub>2</sub>O<sub>3</sub>/Fe@NPC.

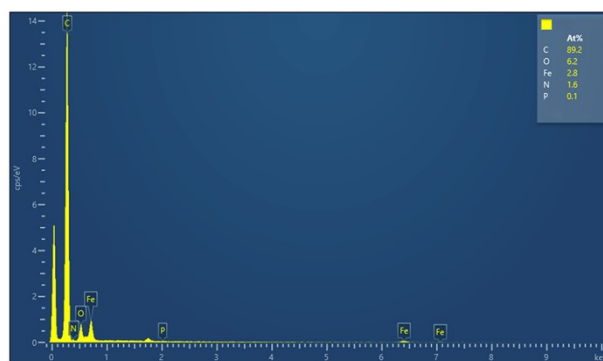

Fig. S7 The corresponding EDS image of  $\alpha$ -Fe<sub>2</sub>O<sub>3</sub>/Fe@NPC.

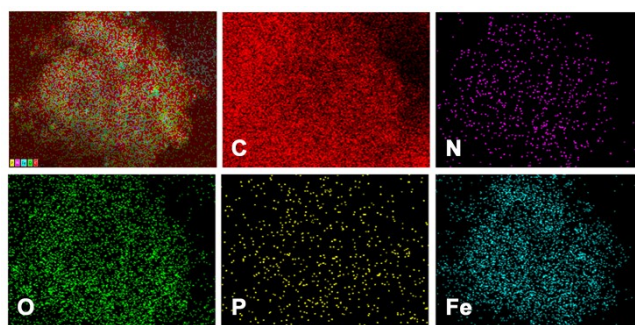

Fig. S8 SEM images of  $\alpha$ -Fe<sub>2</sub>O<sub>3</sub>/Fe@NPC used in the EDS mapping area revealing the elemental distribution of C, N, O, P, and Fe.

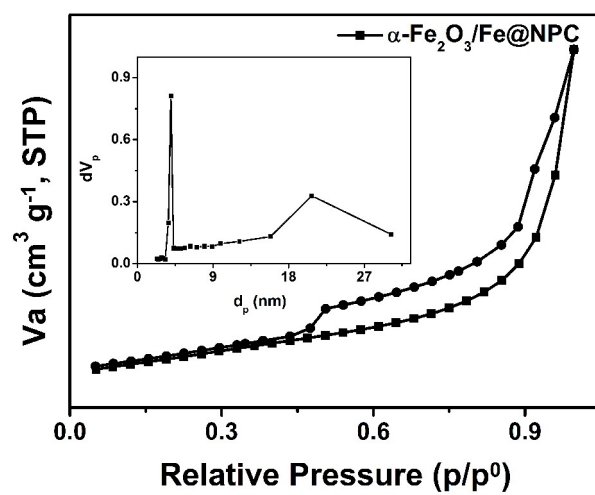

Fig. S9 N<sub>2</sub> adsorption-desorption isotherm of  $\alpha$ -Fe<sub>2</sub>O<sub>3</sub>/Fe@NPC.

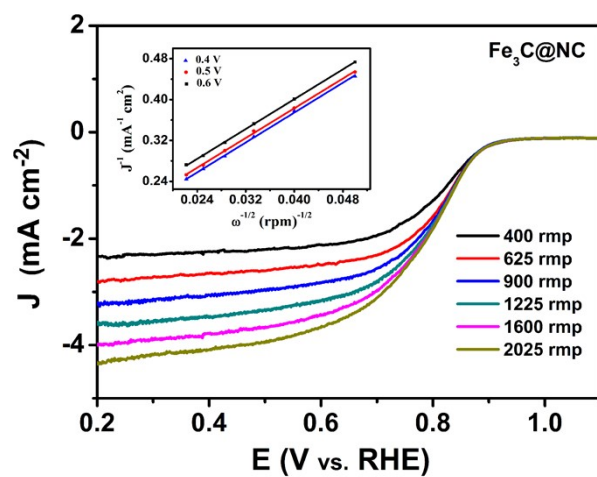

Fig. S10 LSV curves of  $\text{Fe}_3\text{C@NC}$  catalyst in  $\text{O}_2$ -saturated 0.1 M KOH, respectively. (Inset: K-L plots of  $\text{Fe}_3\text{C@NC}$  at various potentials.)

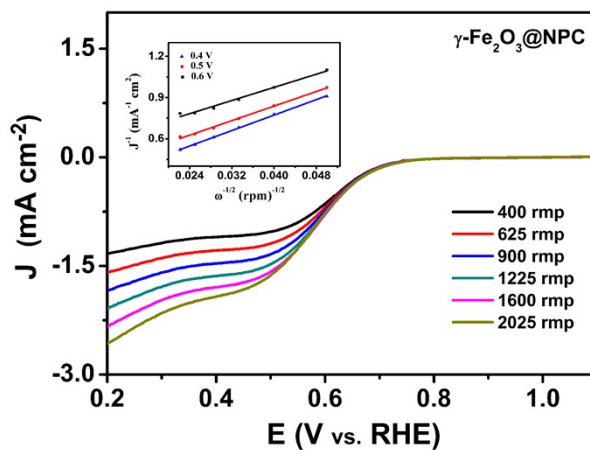

Fig. S11 LSV curves of  $\gamma\text{-Fe}_2\text{O}_3\text{@NPC}$  catalyst in  $\text{O}_2$ -saturated 0.1 M KOH, respectively. (Inset: K-L plots of  $\gamma\text{-Fe}_2\text{O}_3\text{@NPC}$  at various potentials.)

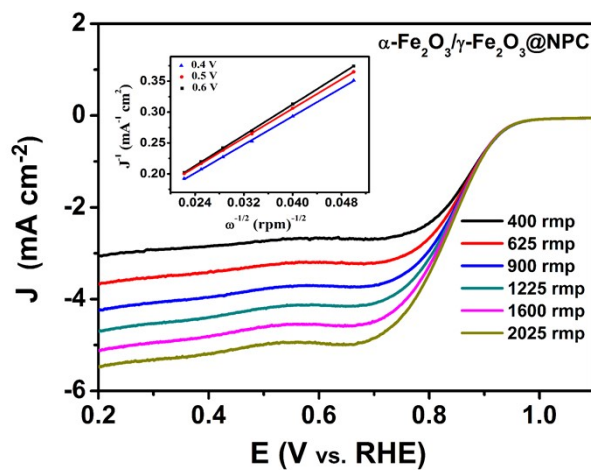

**Fig. S12** LSV curves of  $\alpha\text{-Fe}_2\text{O}_3/\gamma\text{-Fe}_2\text{O}_3\text{@NPC}$  catalyst in  $\text{O}_2$ -saturated 0.1 M KOH, respectively. (Inset: K–L plots of  $\alpha\text{-Fe}_2\text{O}_3/\gamma\text{-Fe}_2\text{O}_3\text{@NPC}$  at various potentials.)

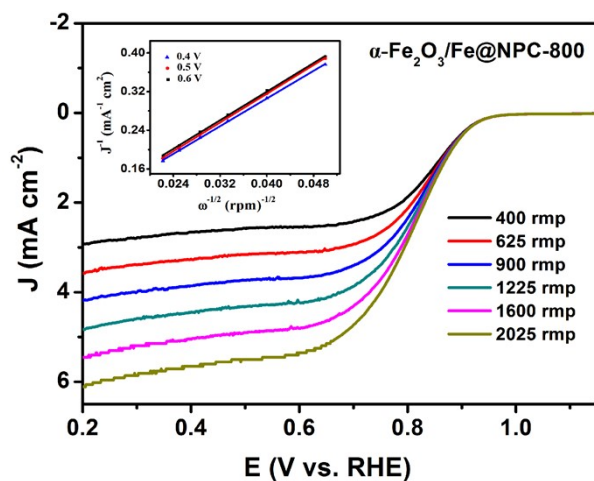

**Fig. S13** LSV curves of  $\alpha\text{-Fe}_2\text{O}_3/\text{Fe@NPC-800}$  in  $\text{O}_2$ -saturated 0.1 M KOH, respectively. (Inset: K–L plots of  $\alpha\text{-Fe}_2\text{O}_3/\text{Fe@NPC-800}$  at various potentials.)



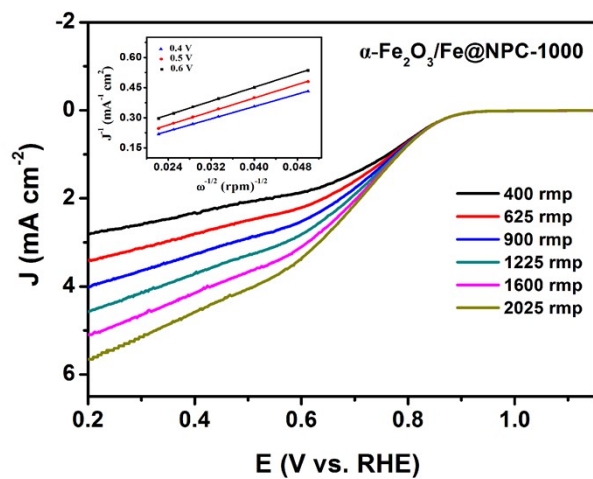

**Fig. S14** LSV curves of  $\alpha\text{-Fe}_2\text{O}_3/\text{Fe@NPC-1000}$  in  $\text{O}_2$ -saturated 0.1 M KOH, respectively. (Inset: K–L plots of  $\alpha\text{-Fe}_2\text{O}_3/\text{Fe@NPC-1000}$  at various potentials.)

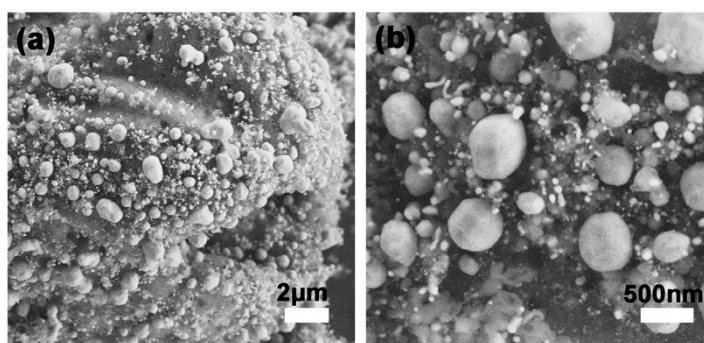

**Fig. S15** Representative SEM images of the  $\alpha\text{-Fe}_2\text{O}_3/\text{Fe@NPC-800}$ .

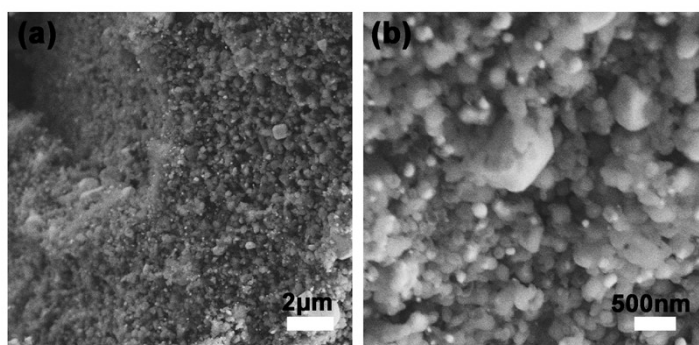

**Fig. S16** Representative SEM images of the  $\alpha\text{-Fe}_2\text{O}_3/\text{Fe@NPC-1000}$ .

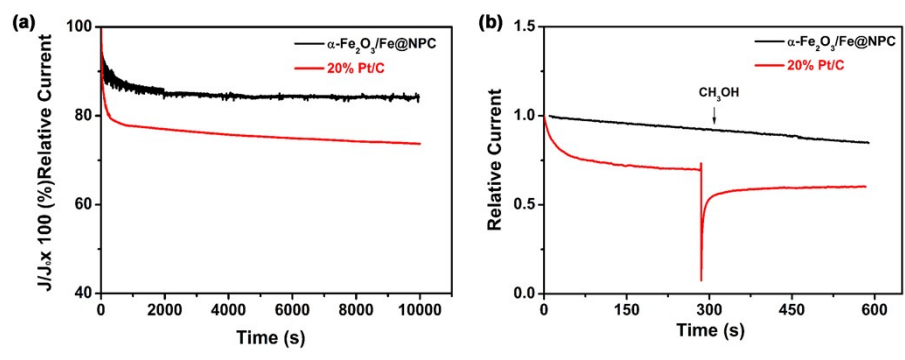

**Fig. S17** (a) Amperometric *i*-*t* curves of  $\alpha\text{-Fe}_2\text{O}_3/\text{Fe@NPC}$  and 20 wt% Pt/C and (b) upon the addition of 3 M methanol in  $\text{O}_2$ -saturated 0.1 M KOH solution with the rotation speed of 1600 rpm.

**Table S1** Levels of C, N, O, P, and Fe of the Fe<sub>3</sub>C@NC, γ-Fe<sub>2</sub>O<sub>3</sub>@NPC, α-Fe<sub>2</sub>O<sub>3</sub>/Fe@NPC, and α-Fe<sub>2</sub>O<sub>3</sub>/γ-Fe<sub>2</sub>O<sub>3</sub>@NPC, respectively.

| Sample                                                                  | Atomic percentage (at%) |      |      |      |      |
|-------------------------------------------------------------------------|-------------------------|------|------|------|------|
|                                                                         | C                       | N    | O    | P    | Fe   |
| Fe <sub>3</sub> C@NC                                                    | 89.61                   | 2.87 | 6.52 | 0    | 1.00 |
| γ-Fe <sub>2</sub> O <sub>3</sub> @NPC                                   | 89.83                   | 5.74 | 3.43 | 0.12 | 0.88 |
| α-Fe <sub>2</sub> O <sub>3</sub> /Fe@NPC                                | 90                      | 5.16 | 4.41 | 0.14 | 0.31 |
| α-Fe <sub>2</sub> O <sub>3</sub> /γ-Fe <sub>2</sub> O <sub>3</sub> @NPC | 88.98                   | 3.75 | 5.68 | 0.04 | 0.10 |

**Table S2** Atomic percentage of different Fe, N, and O species obtained by XPS spectroscopy.

| Sample                                                                  | Atomic percentage (at%) |                  |                                |
|-------------------------------------------------------------------------|-------------------------|------------------|--------------------------------|
|                                                                         | Fe <sup>0</sup>         | Fe <sup>3+</sup> | Fe <sub>2</sub> O <sub>3</sub> |
| γ-Fe <sub>2</sub> O <sub>3</sub> @NPC                                   | 21.3                    | 47.3             | 31.3                           |
| α-Fe <sub>2</sub> O <sub>3</sub> /Fe@NPC                                | 19.4                    | 54.6             | 26.0                           |
| α-Fe <sub>2</sub> O <sub>3</sub> /γ-Fe <sub>2</sub> O <sub>3</sub> @NPC | 0                       | 70.4             | 29.6                           |

| Sample                                                                  | Atomic percentage (at%) |            |             |                                           |
|-------------------------------------------------------------------------|-------------------------|------------|-------------|-------------------------------------------|
|                                                                         | Pyridinic N             | Pyrrolic N | Graphitic N | Quaternary N <sup>+</sup> -O <sup>-</sup> |
| γ-Fe <sub>2</sub> O <sub>3</sub> @NPC                                   | 25.2                    | 16.9       | 36.7        | 21.2                                      |
| α-Fe <sub>2</sub> O <sub>3</sub> /Fe@NPC                                | 29.3                    | 18.6       | 30.1        | 21.2                                      |
| α-Fe <sub>2</sub> O <sub>3</sub> /γ-Fe <sub>2</sub> O <sub>3</sub> @NPC | 30.7                    | 21.6       | 33.5        | 14.2                                      |

| Sample                                                                  | Atomic percentage (at%) |       |      |
|-------------------------------------------------------------------------|-------------------------|-------|------|
|                                                                         | C=O/P=O                 | C-O-P | O-H  |
| γ-Fe <sub>2</sub> O <sub>3</sub> @NPC                                   | 44.0                    | 34.5  | 21.5 |
| α-Fe <sub>2</sub> O <sub>3</sub> /Fe@NPC                                | 73.1                    | 16.6  | 10.3 |
| α-Fe <sub>2</sub> O <sub>3</sub> /γ-Fe <sub>2</sub> O <sub>3</sub> @NPC | 42.9                    | 39.1  | 18.0 |

**Table S3.** The ORR performance of the Fe<sub>3</sub>C@NC,  $\gamma$ -Fe<sub>2</sub>O<sub>3</sub>@NPC,  $\alpha$ -Fe<sub>2</sub>O<sub>3</sub>/Fe@NPC,  $\alpha$ -Fe<sub>2</sub>O<sub>3</sub>/Fe@NPC-800,  $\alpha$ -Fe<sub>2</sub>O<sub>3</sub>/Fe@NPC-1000,  $\alpha$ -Fe<sub>2</sub>O<sub>3</sub>/ $\gamma$ -Fe<sub>2</sub>O<sub>3</sub>@NPC, and 20 wt% Pt/C in alkaline media at 1600 rpm, respectively.

| Sample                                                                                   | $E_{\text{onset}}$ (V) | $E_{1/2}$ (V) | $J_L$ (mA cm <sup>-2</sup> ) | $n$  |
|------------------------------------------------------------------------------------------|------------------------|---------------|------------------------------|------|
| Fe <sub>3</sub> C@NC                                                                     | 0.93                   | 0.84          | 4.01                         | 2.96 |
| $\gamma$ -Fe <sub>2</sub> O <sub>3</sub> @NPC                                            | 0.75                   | 0.59          | 2.37                         | 1.62 |
| $\alpha$ -Fe <sub>2</sub> O <sub>3</sub> /Fe@NPC                                         | 1.01                   | 0.88          | 5.06                         | 3.60 |
| $\alpha$ -Fe <sub>2</sub> O <sub>3</sub> /Fe@NPC-800                                     | 0.97                   | 0.82          | 5.45                         | 2.95 |
| $\alpha$ -Fe <sub>2</sub> O <sub>3</sub> /Fe@NPC-1000                                    | 0.93                   | 0.77          | 5.05                         | 2.64 |
| $\alpha$ -Fe <sub>2</sub> O <sub>3</sub> / $\gamma$ -Fe <sub>2</sub> O <sub>3</sub> @NPC | 0.97                   | 0.86          | 5.13                         | 3.62 |
| 20 wt% Pt/C                                                                              | 0.96                   | 0.86          | 5.61                         | 4.00 |

**Table S4.** Comparison of the ORR performance for  $\alpha$ -Fe<sub>2</sub>O<sub>3</sub>/Fe@NPC catalyst at 1600 rpm in 0.1 M KOH.

| Catalyst                                                                        | $E_{1/2}$ (V) | $J_L$ (mA cm <sup>-2</sup> ) | $E_{onset}$ (V) | Tafel slope (mV dec <sup>-1</sup> ) | $n$       | Reference                                |
|---------------------------------------------------------------------------------|---------------|------------------------------|-----------------|-------------------------------------|-----------|------------------------------------------|
| $\alpha$ -Fe <sub>2</sub> O <sub>3</sub> /Fe@NPC                                | 0.88          | 5.06                         | 1.01            |                                     | 3.60      | This work                                |
| $\alpha$ -Fe <sub>2</sub> O <sub>3</sub> /N-CNTs                                | 0.80          | 3.1                          | 1.16            | 90                                  | 3.37      | <i>Sci. China Mater.</i> ,2015 [1]       |
| FNTAs                                                                           | 0.79          | 5.40                         | 0.97            | 91.0                                | 3.92      | <i>RSC Adv.</i> , 2016 [2]               |
| $\alpha$ -Fe <sub>2</sub> O <sub>3</sub> @N-C                                   | 0.83          | 5.67                         | 0.80            | 115.9                               | 3.46-3.79 | <i>Int. J. Hydrog. Energy.</i> ,2017 [3] |
| Fe-Fe <sub>2</sub> O <sub>3</sub> @NC                                           | 0.72          | 2.23                         | 0.92            | 51.0                                | 3.51-3.92 | <i>Electrochim. Acta</i> ,2017 [4]       |
| $\alpha$ -Fe <sub>2</sub> O <sub>3</sub> /Fe <sub>3</sub> O <sub>4</sub> /hNCNC | 0.838         | 6.02                         | 1.03            | 92.6                                | 3.60-3.90 | <i>J. Mater. Chem. A</i> , 2018 [5]      |
| Fe <sub>2</sub> O <sub>3</sub> @NC                                              | 0.856         | 6.492                        | 1.004           | 74.5                                | 3.976     | <i>Catal. Sci. Technol.</i> , 2019 [6]   |
| Fe <sub>2</sub> O <sub>3</sub> @NC&bio-C                                        | 0.85          | 6.0                          | 0.96            |                                     | 3.94      | <i>J. Energy Chem.</i> ,2020 [7]         |
| FeN <sub>x</sub> /Fe <sub>2</sub> O <sub>3</sub> -CNFs                          | 0.81          | 6.0                          | 0.95            |                                     | 4.0       | <i>J. Mater. Chem. A</i> , 2020 [8]      |
| $\gamma$ -Fe <sub>2</sub> O <sub>3</sub> @CNFs                                  | 0.905         | 4.8                          | 0.915           | 63.3                                | 4.0       | <i>Chem. Eng.J.</i> ,2021 [9]            |
| Fe <sub>2</sub> O <sub>3</sub> /G                                               | 0.804         | 6.45                         | 0.92            | 89.96                               | 3.98-4.0  | <i>New J. Chem.</i> , 2021 [10]          |
| Fe-CNSs-N                                                                       | 0.835         | 5.17                         | 0.948           | 70.6                                | 3.85      | <i>J. Mater. Chem. A</i> , 2021 [11]     |
| $\alpha$ -Fe <sub>2</sub> O <sub>3</sub> /A-C <sub>3</sub> N <sub>4</sub>       | 0.81          | 5.2                          | 0.82            |                                     | 3.7       | <i>J Mater Sci</i> ,2022 [12]            |

## Notes and references

- 1 Sun, M.; Zhang, G.; Liu, H.J.; Liu, Y.; Li, J.H.  $\alpha$ - and  $\gamma$ -Fe<sub>2</sub>O<sub>3</sub> nanoparticle/nitrogen doped carbon nanotube catalysts for high-performance oxygen reduction reaction. *Sci China Mater*, **2015**, 58, 683–692.
- 2 Xue, Y.D.; Jin, W.; Du, H.; Wang, S.N.; Zheng, S.L.; Zhang, Y. Tuning  $\alpha$ -Fe<sub>2</sub>O<sub>3</sub> nanotube arrays for the oxygen reduction reaction in alkaline media. *RSC Adv.*, **2016**, 6, 41878.
- 3 Fu, Y.; Wang, J.; Yu, H.Y.; Li, X.W.; Wang, H.B.; Tian, J.H.; Yang, R.Z. Enhanced electrocatalytic performances of  $\alpha$ -Fe<sub>2</sub>O<sub>3</sub> pseudo-nanocubes for oxygen reduction reaction in alkaline solution with conductive coating. *Int. J. Hydrog. Energy.*, **2017**, 42, 20711–20719.
- 4 Wang, H.; Chen, X.C.; Yin, F.X.; Chen, T.Y.; He, X.B. Metal-organic gel-derived Fe-Fe<sub>2</sub>O<sub>3</sub>@nitrogen-doped-carbon nanoparticles anchored on nitrogen-doped carbon nanotubes as a highly effective catalyst for oxygen reduction reaction. *Electrochim. Acta*, **2017**, 232, 114–122.
- 5 Fan, H.; Mao, K.; Liu, M.; Zhou, O.; Zhao, J.; Sun, T.; Jiang, Y.F.; Du, X.; Zhang, X.L.; Wu, Q.S.; Che, R.C. Tailoring the nano heterointerface of hematite/magnetite on hierarchical nitrogen-doped carbon nanocages for superb oxygen reduction. *J. Mater. Chem. A*, **2018**, 6, 21313.
- 6 Xiao, Z.R.; Shen, G.Q.; Hou, F.; Zhang, R.R.; Li, Y.T.; Yuan, G.; Pan, L.; Zou, J.J.; Wang, L.; Zhang, X.W.; Li, G.Z. Highly dispersed  $\gamma$ -Fe<sub>2</sub>O<sub>3</sub> embedded in nitrogen doped carbon for the efficient oxygen reduction reaction. *Catal. Sci. Technol.*, **2019**, 9, 4581.
- 7 Yan, W. Wu, Y.L.; Chen, Y.L.; Liu, Q.; Wang, K.; Cao, N.; D, F.N. Facile preparation of N-doped corn cob-derived carbon nanofiber efficiently encapsulating Fe<sub>2</sub>O<sub>3</sub> nanocrystals towards high ORR electrocatalytic activity. *J. Energy Chem.*, **2020**, 44, 121–130.
- 8 Yu, Q.; Lian, S.T.; Li, J.T.; Yu, R.H.; Xi, S.B.; Wu, J.S.; Zhao, D.Y.; Mai, L.Q.; Zhou, L. Fe<sub>Nx</sub> and g-Fe<sub>2</sub>O<sub>3</sub> co-functionalized hollow graphitic carbon nanofibers for efficient oxygen reduction in an alkaline medium. *J. Mater. Chem. A*, **2020**, 8, 6076.
- 9 Yao, Z.H.; Li, Y.T.; Chen, D.S.; Zhang, Y.W.; Bao, X.H.; Wang, J.; Zhong, Q.  $\gamma$ -Fe<sub>2</sub>O<sub>3</sub> clusters embedded in 1D porous N-doped carbon matrix as pH-universal electrocatalyst for enhanced oxygen reduction reaction. *Chem. Eng. J.*, **2021**, 415, 129033.
- 10 Haridas, V.; Yaakob, Z.; Sugunan, S.; Narayanan, B. Novel cost-effective synthesis of non-doped turbostratic graphene from a graphite intercalation compound: development of a durable and stable electrocatalyst for the oxygen reduction reaction. *New J. Chem.*, **2021**, 45, 18669.
- 11 Wang, Y.L.; Gan, R.H.; Liu, H.; Dirican, M.; Wei, C.B.; Ma, C.; Shi, J.L. Zhang, X.W. Fe<sub>3</sub>O<sub>4</sub>/Fe<sub>2</sub>O<sub>3</sub>/Fe nanoparticles anchored on N-doped hierarchically porous carbon nanospheres as high-efficiency ORR electrocatalysts for rechargeable Zn-air batteries. *J. Mater. Chem. A*, **2021**, 9, 2764–2774.
- 12 Chen, F.; Yao, C.C.; Qian, J.C.; Fan, J.J.; Chen, X.W.; Wu, W.J.; Xu, L.; Liu, Q.Q.; Li, W.F.  $\alpha$ -Fe<sub>2</sub>O<sub>3</sub>/alkalinized C<sub>3</sub>N<sub>4</sub> heterostructure as efficient electrocatalyst for oxygen reduction reaction. *J Mater Sci*, **2022**, 57, 2012–2020.
